# Supplementary material for: Patients’ pathways to cancer care in Tanzania: documenting and addressing social inequalities in reaching a cancer diagnosis
Source: Springer Nature journal article supplement (doi:10.1186/s12913-021-07438-5), 2022-02-12
Supplement: MOESM1 [file 20127954]

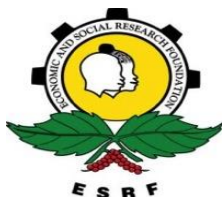

## CANCER PATIENTS AND CANCER SURVIVORS QUESTIONNAIRE

COUNTYREGION/ CODE: \_\_\_\_\_ / \_\_\_\_\_ /

HEALTH FACILITY CODE: \_\_\_\_\_ / \_\_\_\_\_ /

FACILITY LEVEL: \_\_\_\_\_ / \_\_\_\_\_

### SECTION I: Socio-demographic section

|    |            |  |      |  |        |  |
|----|------------|--|------|--|--------|--|
| 1. | <b>Sex</b> |  | Male |  | Female |  |
|----|------------|--|------|--|--------|--|

| No | Questions                                                      | Categories                              |
|----|----------------------------------------------------------------|-----------------------------------------|
| 2. | <b>Are you on treatment?</b>                                   |                                         |
|    |                                                                | <b>Yes</b>                              |
|    |                                                                | <b>No</b>                               |
| 3. | <b>Age (or birth date)</b> _____                               | 18-24 years old                         |
|    |                                                                | 25-34 years old                         |
|    |                                                                | 35-44 years old                         |
|    |                                                                | 45-54 years old                         |
|    |                                                                | 55-64 years old                         |
|    |                                                                | 65-74 years old                         |
|    |                                                                | 75 years or older                       |
|    |                                                                | refused to answer                       |
| 4. | <b>What is the highest level of school you have completed?</b> | 1. Never attended school                |
|    |                                                                | 2. Nursery to class 5                   |
|    |                                                                | 3. Class 6 to 7                         |
|    |                                                                | 4. Form 1 to 2                          |
|    |                                                                | 5. Form 3 to 4                          |
|    |                                                                | 6. Form 5 to 6                          |
|    |                                                                | 7. Trade/technical/ vocational training |

|           |                                                       |                                                                             |
|-----------|-------------------------------------------------------|-----------------------------------------------------------------------------|
|           |                                                       | 8. First Degree                                                             |
|           |                                                       | 9. Higher degree                                                            |
|           |                                                       | 10. Other (Specify)<br>.....                                                |
| <b>5.</b> | <b>What is your marital status?</b>                   | Single (never married)                                                      |
|           |                                                       | Married                                                                     |
|           |                                                       | Cohabiting                                                                  |
|           |                                                       | Widowed                                                                     |
|           |                                                       | Divorced/ Separated                                                         |
|           |                                                       | Other (specify) _____                                                       |
| <b>6.</b> | <b>How many people live with you?</b>                 | Adult                                                                       |
|           |                                                       | Children                                                                    |
| <b>7.</b> | <b>What is your current occupation?</b>               | 1. Student                                                                  |
|           |                                                       | 2. Employed/Professional (Teacher, doctor, nurse, manager, accountant etc.) |
|           |                                                       | 3. Casual worker (attendant in hotel, bar, shop, house help, gardener)      |
|           |                                                       | 4. Housewife                                                                |
|           |                                                       | 5. Business (self-employed)                                                 |
|           |                                                       | 6. Farmer (large scale, subsistent farming, gardening)                      |
|           |                                                       | 7. Unemployed                                                               |
|           |                                                       | 8. Other(specify)<br>_____                                                  |
| <b>8.</b> | <b>What was your occupation prior to the illness?</b> | 1. Student                                                                  |
|           |                                                       | 2. Employed/Professional (Teacher, doctor, nurse, manager, accountant etc.) |
|           |                                                       | 3. Casual worker (attendant in hotel, bar,                                  |

|            |                                                                   |                                                                                                                                                                            |
|------------|-------------------------------------------------------------------|----------------------------------------------------------------------------------------------------------------------------------------------------------------------------|
|            |                                                                   | shop, house help, gardener)<br>4. Housewife<br>5. Business (self-employed)<br>6. Farmer (large scale, subsistent farming, gardening)<br>7. Unemployed<br>8. Other(specify) |
| <b>9.</b>  | <b>What is your main source of income?</b>                        |                                                                                                                                                                            |
| <b>10.</b> | <b>Approximately how much is your household income per month?</b> |                                                                                                                                                                            |
| <b>11.</b> | <b>Where is your home town/city/village?</b>                      | Write out patient' answer: village/town/city<br>_____                                                                                                                      |
|            |                                                                   | Don't know                                                                                                                                                                 |
|            |                                                                   | Refused to answer                                                                                                                                                          |

**SECTION II: PATIENTS CARE PATHWAYS**

**11. We are now going to talk about your journey since you first felt unwell until now. Tell me when did you first feel you were unwell?**

| How long ago? | What happened next? | What did you do? | Where was this? | What was done? | How much did you pay? (note down if they paid it with their own funds or received help from other people) | Did any insurance cover part of the cost? Which? | How did you travel (if in location, patient only says local healer, or local market, ask how long it took to get there) | How much did transport cost (if mode of transport prompt incurrence of costs) |
|---------------|---------------------|------------------|-----------------|----------------|-----------------------------------------------------------------------------------------------------------|--------------------------------------------------|-------------------------------------------------------------------------------------------------------------------------|-------------------------------------------------------------------------------|
|               |                     |                  |                 |                |                                                                                                           |                                                  |                                                                                                                         |                                                                               |
|               |                     |                  |                 |                |                                                                                                           |                                                  |                                                                                                                         |                                                                               |
|               |                     |                  |                 |                |                                                                                                           |                                                  |                                                                                                                         |                                                                               |
|               |                     |                  |                 |                |                                                                                                           |                                                  |                                                                                                                         |                                                                               |

## Patient's perspective on their experiences

| 12.                            | <p><b>Was there anything you needed which you did not get?</b></p> <p>Yes <input type="checkbox"/> No <input type="checkbox"/></p> <p>If yes,</p> <table border="1" data-bbox="248 562 1466 709"> <thead> <tr> <th data-bbox="248 562 573 604">What?</th> <th data-bbox="573 562 792 604">Not available</th> <th data-bbox="792 562 1011 604">Too expensive</th> <th data-bbox="1011 562 1214 604">Too far</th> <th data-bbox="1214 562 1466 604">unacceptable</th> </tr> </thead> <tbody> <tr> <td data-bbox="248 604 573 636"></td> <td data-bbox="573 604 792 636"></td> <td data-bbox="792 604 1011 636"></td> <td data-bbox="1011 604 1214 636"></td> <td data-bbox="1214 604 1466 636"></td> </tr> <tr> <td data-bbox="248 636 573 667"></td> <td data-bbox="573 636 792 667"></td> <td data-bbox="792 636 1011 667"></td> <td data-bbox="1011 636 1214 667"></td> <td data-bbox="1214 636 1466 667"></td> </tr> <tr> <td data-bbox="248 667 573 709"></td> <td data-bbox="573 667 792 709"></td> <td data-bbox="792 667 1011 709"></td> <td data-bbox="1011 667 1214 709"></td> <td data-bbox="1214 667 1466 709"></td> </tr> </tbody> </table> | What?                                                                                                                                                                                                                                                                                                                                                                                                                                                                                                                                                                                                                                                                              | Not available    | Too expensive    | Too far              | unacceptable            |                                |                      |                       |                               |  |  |  |  |  |  |  |  |  |  |  |
|--------------------------------|--------------------------------------------------------------------------------------------------------------------------------------------------------------------------------------------------------------------------------------------------------------------------------------------------------------------------------------------------------------------------------------------------------------------------------------------------------------------------------------------------------------------------------------------------------------------------------------------------------------------------------------------------------------------------------------------------------------------------------------------------------------------------------------------------------------------------------------------------------------------------------------------------------------------------------------------------------------------------------------------------------------------------------------------------------------------------------------------------------------------------------------------------------|------------------------------------------------------------------------------------------------------------------------------------------------------------------------------------------------------------------------------------------------------------------------------------------------------------------------------------------------------------------------------------------------------------------------------------------------------------------------------------------------------------------------------------------------------------------------------------------------------------------------------------------------------------------------------------|------------------|------------------|----------------------|-------------------------|--------------------------------|----------------------|-----------------------|-------------------------------|--|--|--|--|--|--|--|--|--|--|--|
| What?                          | Not available                                                                                                                                                                                                                                                                                                                                                                                                                                                                                                                                                                                                                                                                                                                                                                                                                                                                                                                                                                                                                                                                                                                                          | Too expensive                                                                                                                                                                                                                                                                                                                                                                                                                                                                                                                                                                                                                                                                      | Too far          | unacceptable     |                      |                         |                                |                      |                       |                               |  |  |  |  |  |  |  |  |  |  |  |
|                                |                                                                                                                                                                                                                                                                                                                                                                                                                                                                                                                                                                                                                                                                                                                                                                                                                                                                                                                                                                                                                                                                                                                                                        |                                                                                                                                                                                                                                                                                                                                                                                                                                                                                                                                                                                                                                                                                    |                  |                  |                      |                         |                                |                      |                       |                               |  |  |  |  |  |  |  |  |  |  |  |
|                                |                                                                                                                                                                                                                                                                                                                                                                                                                                                                                                                                                                                                                                                                                                                                                                                                                                                                                                                                                                                                                                                                                                                                                        |                                                                                                                                                                                                                                                                                                                                                                                                                                                                                                                                                                                                                                                                                    |                  |                  |                      |                         |                                |                      |                       |                               |  |  |  |  |  |  |  |  |  |  |  |
|                                |                                                                                                                                                                                                                                                                                                                                                                                                                                                                                                                                                                                                                                                                                                                                                                                                                                                                                                                                                                                                                                                                                                                                                        |                                                                                                                                                                                                                                                                                                                                                                                                                                                                                                                                                                                                                                                                                    |                  |                  |                      |                         |                                |                      |                       |                               |  |  |  |  |  |  |  |  |  |  |  |
| 13.                            | <p><b>Was there anything you decided not to do because it was unacceptable to you? Yes, no</b></p> <p>If yes, give details</p> <p>_____</p> <p>—</p> <p>(check if they consulted alternative health systems)</p> <p>If they did:</p>                                                                                                                                                                                                                                                                                                                                                                                                                                                                                                                                                                                                                                                                                                                                                                                                                                                                                                                   |                                                                                                                                                                                                                                                                                                                                                                                                                                                                                                                                                                                                                                                                                    |                  |                  |                      |                         |                                |                      |                       |                               |  |  |  |  |  |  |  |  |  |  |  |
| 14.                            | <p><b>Why did you resort to alternative options?</b></p> <p>If they did not?</p> <p>Did you ever consider alternative medicine options? Yes _____, No _____</p> <p>If no, why not? _____</p> <p>—</p>                                                                                                                                                                                                                                                                                                                                                                                                                                                                                                                                                                                                                                                                                                                                                                                                                                                                                                                                                  |                                                                                                                                                                                                                                                                                                                                                                                                                                                                                                                                                                                                                                                                                    |                  |                  |                      |                         |                                |                      |                       |                               |  |  |  |  |  |  |  |  |  |  |  |
| 15.                            | <p><b>Given the story you have just told, what was done well?</b></p>                                                                                                                                                                                                                                                                                                                                                                                                                                                                                                                                                                                                                                                                                                                                                                                                                                                                                                                                                                                                                                                                                  | <table border="1" data-bbox="1079 1396 1466 1864"> <tr> <td data-bbox="1079 1396 1466 1438">Early diagnosis;</td> </tr> <tr> <td data-bbox="1079 1438 1466 1480">Rapid diagnosis;</td> </tr> <tr> <td data-bbox="1079 1480 1466 1522">Short wait for test;</td> </tr> <tr> <td data-bbox="1079 1522 1466 1564">Short wait for surgery;</td> </tr> <tr> <td data-bbox="1079 1564 1466 1648">Good attitude of professionals</td> </tr> <tr> <td data-bbox="1079 1648 1466 1690">Effective treatment;</td> </tr> <tr> <td data-bbox="1079 1690 1466 1732">Good pain management;</td> </tr> <tr> <td data-bbox="1079 1732 1466 1864">Insurance coverage available;</td> </tr> </table> | Early diagnosis; | Rapid diagnosis; | Short wait for test; | Short wait for surgery; | Good attitude of professionals | Effective treatment; | Good pain management; | Insurance coverage available; |  |  |  |  |  |  |  |  |  |  |  |
| Early diagnosis;               |                                                                                                                                                                                                                                                                                                                                                                                                                                                                                                                                                                                                                                                                                                                                                                                                                                                                                                                                                                                                                                                                                                                                                        |                                                                                                                                                                                                                                                                                                                                                                                                                                                                                                                                                                                                                                                                                    |                  |                  |                      |                         |                                |                      |                       |                               |  |  |  |  |  |  |  |  |  |  |  |
| Rapid diagnosis;               |                                                                                                                                                                                                                                                                                                                                                                                                                                                                                                                                                                                                                                                                                                                                                                                                                                                                                                                                                                                                                                                                                                                                                        |                                                                                                                                                                                                                                                                                                                                                                                                                                                                                                                                                                                                                                                                                    |                  |                  |                      |                         |                                |                      |                       |                               |  |  |  |  |  |  |  |  |  |  |  |
| Short wait for test;           |                                                                                                                                                                                                                                                                                                                                                                                                                                                                                                                                                                                                                                                                                                                                                                                                                                                                                                                                                                                                                                                                                                                                                        |                                                                                                                                                                                                                                                                                                                                                                                                                                                                                                                                                                                                                                                                                    |                  |                  |                      |                         |                                |                      |                       |                               |  |  |  |  |  |  |  |  |  |  |  |
| Short wait for surgery;        |                                                                                                                                                                                                                                                                                                                                                                                                                                                                                                                                                                                                                                                                                                                                                                                                                                                                                                                                                                                                                                                                                                                                                        |                                                                                                                                                                                                                                                                                                                                                                                                                                                                                                                                                                                                                                                                                    |                  |                  |                      |                         |                                |                      |                       |                               |  |  |  |  |  |  |  |  |  |  |  |
| Good attitude of professionals |                                                                                                                                                                                                                                                                                                                                                                                                                                                                                                                                                                                                                                                                                                                                                                                                                                                                                                                                                                                                                                                                                                                                                        |                                                                                                                                                                                                                                                                                                                                                                                                                                                                                                                                                                                                                                                                                    |                  |                  |                      |                         |                                |                      |                       |                               |  |  |  |  |  |  |  |  |  |  |  |
| Effective treatment;           |                                                                                                                                                                                                                                                                                                                                                                                                                                                                                                                                                                                                                                                                                                                                                                                                                                                                                                                                                                                                                                                                                                                                                        |                                                                                                                                                                                                                                                                                                                                                                                                                                                                                                                                                                                                                                                                                    |                  |                  |                      |                         |                                |                      |                       |                               |  |  |  |  |  |  |  |  |  |  |  |
| Good pain management;          |                                                                                                                                                                                                                                                                                                                                                                                                                                                                                                                                                                                                                                                                                                                                                                                                                                                                                                                                                                                                                                                                                                                                                        |                                                                                                                                                                                                                                                                                                                                                                                                                                                                                                                                                                                                                                                                                    |                  |                  |                      |                         |                                |                      |                       |                               |  |  |  |  |  |  |  |  |  |  |  |
| Insurance coverage available;  |                                                                                                                                                                                                                                                                                                                                                                                                                                                                                                                                                                                                                                                                                                                                                                                                                                                                                                                                                                                                                                                                                                                                                        |                                                                                                                                                                                                                                                                                                                                                                                                                                                                                                                                                                                                                                                                                    |                  |                  |                      |                         |                                |                      |                       |                               |  |  |  |  |  |  |  |  |  |  |  |

|     |                                                                                                                                                                                                                                                                                                                                                               |                          |
|-----|---------------------------------------------------------------------------------------------------------------------------------------------------------------------------------------------------------------------------------------------------------------------------------------------------------------------------------------------------------------|--------------------------|
|     |                                                                                                                                                                                                                                                                                                                                                               | Other specify.....       |
| 16. | <b>Has this experience impacted on your work? [check all that apply]</b><br><input type="checkbox"/> Yes <input type="checkbox"/> No <input type="checkbox"/> N/A<br>____ Unable to work____.<br>____ Less time working, how much time? _____<br>____ Changed own activity, please specify_____<br>____ Changed activity by someone else, please specify_____ |                          |
|     |                                                                                                                                                                                                                                                                                                                                                               |                          |
|     |                                                                                                                                                                                                                                                                                                                                                               |                          |
|     |                                                                                                                                                                                                                                                                                                                                                               |                          |
|     |                                                                                                                                                                                                                                                                                                                                                               |                          |
| 17. | <b>Have you told your friends or family about your illness?</b>                                                                                                                                                                                                                                                                                               | My family                |
|     |                                                                                                                                                                                                                                                                                                                                                               | My friends               |
|     |                                                                                                                                                                                                                                                                                                                                                               | Both                     |
|     |                                                                                                                                                                                                                                                                                                                                                               | Neither                  |
| 18. | <b>Who are your main sources of support?</b>                                                                                                                                                                                                                                                                                                                  | Community health workers |
|     |                                                                                                                                                                                                                                                                                                                                                               | Volunteers               |
|     |                                                                                                                                                                                                                                                                                                                                                               | Family                   |
|     |                                                                                                                                                                                                                                                                                                                                                               | Friends                  |
|     |                                                                                                                                                                                                                                                                                                                                                               | Support groups           |
|     |                                                                                                                                                                                                                                                                                                                                                               | Faith groups             |
|     | Other _____                                                                                                                                                                                                                                                                                                                                                   |                          |
|     | Thank you very much. Anything else you would like to tell us                                                                                                                                                                                                                                                                                                  |                          |
|     | _____                                                                                                                                                                                                                                                                                                                                                         |                          |
